# Supplementary material for: Small intestine vs. colon ecology and physiology: Why it matters in probiotic administration
Source: PubMed Central journal article supplement — Cell Rep Med. 2023 Sep 7;4(9):101190. doi: 10.1016/j.xcrm.2023.101190 (PMC10518632; doi:10.1016/j.xcrm.2023.101190), 2023-09-07
Supplement: mmc1.pdf [file mmc1.pdf]

**Cell Reports Medicine, Volume 4**

## **Supplemental information**

**Small intestine vs. colon ecology**

**and physiology: Why it matters**

**in probiotic administration**

**Benjamin Anderschou Holbech Jensen, Marc Heyndrickx, Daisy Jonkers, Alan Mackie, Sam Millet, Malwina Naghibi, Simone Isling Pærregaard, Bruno Pot, Delphine Saulnier, Christian Sina, Luc Gerardus Willibrordus Sterkman, Pieter Van den Abbeele, Naomi Vita Venlet, Erwin G. Zoetendal, and Arthur Constantijn Ouwehand**

Table S1. Non-exhaustive list of capsule systems for the collection of small intestinal samples

| <b>Technology name</b>                                                         | <b>Sampling activation</b>                   | <b>Sample collection mechanism</b>                | <b>Comment</b>                   | <b>Reference</b> |
|--------------------------------------------------------------------------------|----------------------------------------------|---------------------------------------------------|----------------------------------|------------------|
| Automatische Darmkapsel                                                        | Timing mechanism                             | Passive influx                                    |                                  | 87               |
| Microelectromechanical systems technology                                      | Wireless                                     | Microelectromechanical piston                     | Risk of downstream contamination | 25,88            |
| IntelliCap®                                                                    | Wireless or at predefined pH                 | Microelectromechanical piston                     | Manufacturing discontinued       | 89               |
| Ingestible osmotic pill                                                        | Dissolving of enteric coating in alkaline pH | Osmotic pressure                                  |                                  | 90               |
| Intestine microbiota aspiration                                                | Not given                                    | Not given; no microelectromechanical technologies |                                  | 25               |
| 3D printed acrylic capsule, fast-absorbing hydrogel and flexible PDMS membrane | Dissolving of enteric coating in alkaline pH | Expanding hydrogel                                |                                  | 91               |

Table S2. Main advantages and disadvantages between mouse and pig as human models

|              | <b>Advantages</b>                                                                                                                  | <b>Disadvantages</b>                                                                            | <b>References</b>   |
|--------------|------------------------------------------------------------------------------------------------------------------------------------|-------------------------------------------------------------------------------------------------|---------------------|
| <b>Mouse</b> | Well characterised, transgenic and knockout mice, as well as chemically induced neoplastic and inflammatory disease models in mice | Large difference in anatomy and microbiota composition                                          | 94,113,117,133      |
| <b>Pig</b>   | Omnivorous animal with more similarities to humans than mice<br>More invasive procedures are possible compared to                  | Anatomical and functional differences<br>Relative lack of genetic models<br>High cost of animal | 115-117,121,134-137 |

|              |                                                                                 |                                                                                |  |
|--------------|---------------------------------------------------------------------------------|--------------------------------------------------------------------------------|--|
|              | humans (euthanasia and sampling along GI tract, cannulation of healthy animals) | maintenance and husbandry<br>Long reproductive cycles<br>Long time to maturity |  |
| <b>Human</b> | Gold standard                                                                   | Ethical considerations<br>Ileostomy patients may have altered gut function     |  |
